# Supplementary material for: The Citrus Flavonoid Nobiletin Downregulates Angiopoietin-like Protein 3 (ANGPTL3) Expression and Exhibits Lipid-Modulating Effects in Hepatic Cells and Adult Zebrafish Models
Source: MDPI journal article supplement (doi:10.3390/ijms232012485), 2022-10-18
Supplement: s1 [file s1]

**Table S1.** Biological processes in the Gene Ontology (GO) analysis of upregulated gene sets in nobiletin-treated HepG2 cells.

| Gene Sets Follow link to MsigDB                                | Enrichment Score (ES) | Nominal ES (NES) |
|----------------------------------------------------------------|-----------------------|------------------|
| GOBP_RIBONUCLEOPROTEIN_COMPLEX_BIOGENESIS                      | 0.43                  | 3.48             |
| GOBP_NCRNA_PROCESSING                                          | 0.41                  | 3.35             |
| GOBP_NCRNA_METABOLIC_PROCESS                                   | 0.38                  | 3.31             |
| GOBP_RIBOSOME_BIOGENESIS                                       | 0.42                  | 3.22             |
| GOBP_RNA_PROCESSING                                            | 0.32                  | 3.06             |
| GOBP_RRNA_METABOLIC_PROCESS                                    | 0.4                   | 2.81             |
| GOBP_DNA_REPAIR                                                | 0.32                  | 2.67             |
| GOBP_DNA_REPLICATION                                           | 0.34                  | 2.52             |
| GOBP_ENDOPLASMIC_RETICULUM_ORGANIZATION                        | 0.54                  | 2.48             |
| GOBP_TRNA_METABOLIC_PROCESS                                    | 0.39                  | 2.47             |
| GOBP_MRNA_METABOLIC_PROCESS                                    | 0.28                  | 2.46             |
| GOBP_MITOCHONDRIAL_GENE_EXPRESSION                             | 0.42                  | 2.41             |
| GOBP_CHROMOSOME_SEGREGATION                                    | 0.32                  | 2.4              |
| GOBP_DOUBLE_STRAND_BREAK_REPAIR                                | 0.34                  | 2.38             |
| GOBP_MRNA_PROCESSING                                           | 0.31                  | 2.37             |
| GOBP_GOLGI_VESICLE_TRANSPORT                                   | 0.36                  | 2.36             |
| GOBP_TRANSLATIONAL_INITIATION                                  | 0.46                  | 2.36             |
| GOBP_ENDOPLASMIC_RETICULUM_TO_GOLGI_VESICLE_MEDIATED_TRANSPORT | 0.46                  | 2.34             |
| GOBP_MITOCHONDRIAL_RESPIRATORY_CHAIN_COMPLEX_ASSEMBLY          | 0.48                  | 2.33             |
| GOBP_RETROGRADE_TRANSPORT_ENDOSOME_TO_GOLGI                    | 0.54                  | 2.3              |
| GOBP_RIBONUCLEOPROTEIN_COMPLEX_SUBUNIT_ORGANIZATION            | 0.42                  | 2.3              |
| GOBP_TRNA_PROCESSING                                           | 0.41                  | 2.29             |
| GOBP_REGULATION_OF_CELL_CYCLE_PHASE_TRANSITION                 | 0.31                  | 2.26             |
| GOBP_MITOTIC_CELL_CYCLE_PROCESS                                | 0.26                  | 2.24             |
| GOBP_RNA_PHOSPHODIESTER_BOND_HYDROLYSIS                        | 0.41                  | 2.24             |
| GOBP_MITOTIC_CELL_CYCLE                                        | 0.24                  | 2.23             |
| GOBP_DNA_DEPENDENT_DNA_REPLICATION                             | 0.35                  | 2.23             |
| GOBP_CELL_CYCLE_PROCESS                                        | 0.23                  | 2.21             |
| GOBP_RNA_MODIFICATION                                          | 0.37                  | 2.21             |
| GOBP_REGULATION_OF_MITOTIC_CELL_CYCLE_PHASE_TRANSITION         | 0.33                  | 2.21             |
| GOBP_CHROMOSOME_ORGANIZATION                                   | 0.23                  | 2.2              |
| GOBP_AMIDE_BIOSYNTHETIC_PROCESS                                | 0.24                  | 2.18             |
| GOBP_DNA_TEMPLATED_TRANSCRIPTION_INITIATION                    | 0.43                  | 2.17             |
| GOBP_CELLULAR_RESPONSE_TO_DNA_DAMAGE_STIMULUS                  | 0.24                  | 2.17             |
| GOBP_PEPTIDE_BIOSYNTHETIC_PROCESS                              | 0.25                  | 2.13             |
| GOBP_MITOCHONDRIAL_TRANSLATION                                 | 0.41                  | 2.13             |
| GOBP_DNA_METABOLIC_PROCESS                                     | 0.22                  | 2.11             |
| GOBP_REGULATION_OF_DNA_REPAIR                                  | 0.44                  | 2.1              |

|                                                                |      |      |
|----------------------------------------------------------------|------|------|
| GOBP_NUCLEAR_CHROMOSOME_SEGREGATION                            | 0.31 | 2.09 |
| GOBP_REGULATION_OF_CELLULAR_AMIDE_METABOLIC_PROCESS            | 0.27 | 2.09 |
| GOBP_CELLULAR_MACROMOLECULE_BIOSYNTHETIC_PROCESS               | 0.19 | 2.08 |
| GOBP_CELL_CYCLE_PHASE_TRANSITION                               | 0.26 | 2.05 |
| GOBP_CELL_CYCLE                                                | 0.19 | 2.05 |
| GOBP_MITOTIC_CELL_CYCLE_PHASE_TRANSITION                       | 0.27 | 1.99 |
| GOBP_PEPTIDE_METABOLIC_PROCESS                                 | 0.21 | 1.97 |
| GOBP_REGULATION_OF_CELLULAR_MACROMOLECULE_BIOSYNTHETIC_PROCESS | 0.22 | 1.96 |
| GOBP_MODIFICATION_DEPENDENT_MACROMOLECULE_CATABOLIC_PROCESS    | 0.24 | 1.93 |
| GOBP_MITOCHONDRION_ORGANIZATION                                | 0.31 | 2.35 |
| GOBP_REGULATION_OF_MRNA_CATABOLIC_PROCESS                      | 0.41 | 2.3  |
| GOBP_REGULATION_OF_MRNA_METABOLIC_PROCESS                      | 0.33 | 2.18 |
| GOBP_REGULATION_OF_TRANSLATIONAL_INITIATION                    | 0.47 | 2.14 |
| GOBP_MITOCHONDRIAL_TRANSPORT                                   | 0.41 | 2.08 |
| GOBP_CELL_CYCLE_CHECKPOINT_SIGNALING                           | 0.37 | 2.09 |
| GOBP_TRNA_MODIFICATION                                         | 0.42 | 2.02 |
| GOBP_RECOMBINATIONAL_REPAIR                                    | 0.33 | 2    |
| GOBP_INTRACELLULAR_TRANSPORT                                   | 0.19 | 1.95 |
| GOBP_MITOTIC_SISTER_CHROMATID_SEGREGATION                      | 0.34 | 1.95 |
| GOBP_CELLULAR_AMIDE_METABOLIC_PROCESS                          | 0.2  | 1.93 |
| GOBP_REGULATION_OF_CYSTEINE_TYPE_ENDOPEPTIDASE_ACTIVITY        | 0.35 | 1.87 |
| GOBP_REGULATION_OF_RESPONSE_TO_DNA_DAMAGE_STIMULUS             | 0.32 | 1.86 |
| GOBP_POSTTRANSCRIPTIONAL_REGULATION_OF_GENE_EXPRESSION         | 0.23 | 1.85 |
| GOBP_REGULATION_OF_CELL_CYCLE                                  | 0.19 | 1.83 |
| GOBP_SISTER_CHROMATID_SEGREGATION                              | 0.35 | 2.12 |
| GOBP_RNA_DESTABILIZATION                                       | 0.44 | 2.09 |
| GOBP_PROTEIN_FOLDING                                           | 0.32 | 2    |
| GOBP_CYTOSOLIC_TRANSPORT                                       | 0.39 | 2    |
| GOBP_RNA_SPLICING_VIA_TRANSESTERIFICATION_REACTIONS            | 0.3  | 1.99 |
| GOBP_MATURATION_OF_SSU_RRNA                                    | 0.46 | 1.96 |
| GOBP_REGULATION_OF_MITOTIC_CELL_CYCLE                          | 0.25 | 1.93 |
| GOBP_PROTEIN_TARGETING_TO_MITOCHONDRION                        | 0.43 | 1.93 |
| GOBP_RNA_SPLICING                                              | 0.27 | 1.92 |
| GOBP_ESTABLISHMENT_OF_PROTEIN_LOCALIZATION_TO_ORGANELLE        | 0.26 | 1.91 |
| GOBP_REGULATION_OF_DNA_REPLICATION                             | 0.34 | 1.9  |
| GOBP_CELLULAR_RESPIRATION                                      | 0.34 | 1.86 |
| GOBP_REGULATION_OF_CELL_CYCLE_PROCESS                          | 0.23 | 1.86 |
| GOBP_PROTEIN_LOCALIZATION_TO_ORGANELLE                         | 0.22 | 1.85 |
| GOBP_NUCLEOBASE_CONTAINING_COMPOUND_TRANSPORT                  | 0.29 | 1.83 |
| GOBP_RIBOSOMAL_SMALL_SUBUNIT_BIOGENESIS                        | 0.47 | 2.08 |
| GOBP_REGULATION_OF_DOUBLE_STRAND_BREAK_REPAIR                  | 0.45 | 2.02 |

|                                                                         |      |      |
|-------------------------------------------------------------------------|------|------|
| GOBP_DNA_CONFORMATION_CHANGE                                            | 0.3  | 1.95 |
| GOBP_DNA_GEOMETRIC_CHANGE                                               | 0.41 | 1.92 |
| GOBP_ESTABLISHMENT_OF_RNA_LOCALIZATION                                  | 0.34 | 1.85 |
| GOBP_NEGATIVE_REGULATION_OF_CELL_CYCLE_PHASE_TRANSITION                 | 0.31 | 1.93 |
| GOBP_REGULATION_OF_CHROMOSOME_SEGREGATION                               | 0.41 | 1.94 |
| GOBP_NEGATIVE_REGULATION_OF_CELLULAR_MACROMOLECULE_BIOSYNTHETIC_PROCESS | 0.29 | 1.91 |
| GOBP_RNA_CATABOLIC_PROCESS                                              | 0.29 | 1.9  |
| GOBP_MITOTIC_CELL_CYCLE_CHECKPOINT_SIGNALING                            | 0.36 | 1.87 |
| GOBP_CELL_DIVISION                                                      | 0.23 | 1.86 |
| GOBP_ORGANONITROGEN_COMPOUND_BIOSYNTHETIC_PROCESS                       | 0.16 | 1.67 |
| GOBP_POSITIVE_REGULATION_OF_MITOTIC_CELL_CYCLE                          | 0.37 | 1.91 |
| GOBP_NUCLEAR_TRANSCRIBED_MRNA_CATABOLIC_PROCESS                         | 0.38 | 1.81 |
| GOBP_PROTEIN_MODIFICATION_BY_SMALL_PROTEIN_CONJUGATION_OR_REMOVAL       | 0.19 | 1.72 |
| GOBP_ESTABLISHMENT_OF_PROTEIN_LOCALIZATION                              | 0.15 | 1.55 |
| GOBP_POSITIVE_REGULATION_OF_MRNA_METABOLIC_PROCESS                      | 0.38 | 1.94 |
| GOBP_PROTEIN_TARGETING                                                  | 0.28 | 1.82 |
| GOBP_MRNA_CATABOLIC_PROCESS                                             | 0.32 | 1.98 |
| GOBP_RNA_3_END_PROCESSING                                               | 0.37 | 1.86 |
| GOBP_ENDOSOMAL_TRANSPORT                                                | 0.31 | 1.76 |
| GOBP_RIBOSOMAL_LARGE_SUBUNIT_BIOGENESIS                                 | 0.41 | 1.85 |
| GOBP_RESPONSE_TO_IONIZING_RADIATION                                     | 0.4  | 1.86 |
| GOBP_PROTEASOMAL_PROTEIN_CATABOLIC_PROCESS                              | 0.22 | 1.67 |
| GOBP_POSITIVE_REGULATION_OF_MITOTIC_CELL_CYCLE_PHASE_TRANSITION         | 0.4  | 1.88 |
| GOBP_POSITIVE_REGULATION_OF_DNA_REPAIR                                  | 0.44 | 1.76 |
| GOBP_SPINDLE_ORGANIZATION                                               | 0.31 | 1.78 |
| GOBP_RNA_LOCALIZATION                                                   | 0.3  | 1.77 |
| GOBP_NEGATIVE_REGULATION_OF_MRNA_METABOLIC_PROCESS                      | 0.43 | 1.94 |
| GOBP_NUCLEIC_ACID_PHOSPHODIESTER_BOND_HYDROLYSIS                        | 0.26 | 1.75 |
| GOBP_MITOTIC_NUCLEAR_DIVISION                                           | 0.26 | 1.74 |
| GOBP_PROTEIN_DNA_COMPLEX_ASSEMBLY                                       | 0.33 | 1.74 |
| GOBP_NEGATIVE_REGULATION_OF_CELLULAR_AMIDE_METABOLIC_PROCESS            | 0.28 | 1.73 |
| GOBP_PROTEIN_DNA_COMPLEX_SUBUNIT_ORGANIZATION                           | 0.3  | 1.72 |
| GOBP_ORGANELLE_FISSION                                                  | 0.22 | 1.7  |
| GOBP_PROTEASOME_MEDIATED_UBIQUITIN_DEPENDENT_PROTEIN_CATABOLIC_PROCESS  | 0.23 | 1.69 |
| GOBP_AEROBIC_RESPIRATION                                                | 0.36 | 1.81 |
| GOBP_PROTEIN_POLYUBIQUITINATION                                         | 0.29 | 1.71 |
| GOBP_MEMBRANE_FUSION                                                    | 0.36 | 1.77 |
| GOBP_ORGANIC_CYCLIC_COMPOUND_CATABOLIC_PROCESS                          | 0.22 | 1.65 |
| GOBP_RNA_PHOSPHODIESTER_BOND_HYDROLYSIS_ENDONUCLEOLYTIC                 | 0.4  | 1.78 |
| GOBP_PHOSPHATIDYLINOSITOL_PHOSPHATE_BIOSYNTHETIC_PROCESS                | 0.41 | 1.67 |
| GOBP_POSITIVE_REGULATION_OF_CELL_CYCLE_PHASE_TRANSITION                 | 0.36 | 1.72 |

|                                                                  |      |      |
|------------------------------------------------------------------|------|------|
| GOBP_NEGATIVE_REGULATION_OF_CELL_CYCLE_PROCESS                   | 0.26 | 1.67 |
| GOBP_NUCLEOSIDE_TRIPHOSPHATE_METABOLIC_PROCESS                   | 0.41 | 1.7  |
| GOBP_METAPHASE_ANAPHASE_TRANSITION_OF_CELL_CYCLE                 | 0.4  | 1.7  |
| GOBP_CELLULAR_AMINO_ACID_METABOLIC_PROCESS                       | 0.25 | 1.69 |
| GOBP_ORGANOPHOSPHATE_BIOSYNTHETIC_PROCESS                        | 0.21 | 1.65 |
| GOBP_PHOSPHATIDYLINOSITOL_BIOSYNTHETIC_PROCESS                   | 0.33 | 1.67 |
| GOBP_POSITIVE_REGULATION_OF_CYSTEINE_TYPE_ENDOPEPTIDASE_ACTIVITY | 0.38 | 1.69 |
| GOBP_ESTABLISHMENT_OF_PROTEIN_LOCALIZATION_TO_MEMBRANE           | 0.28 | 1.76 |
| GOBP_STEROL_BIOSYNTHETIC_PROCESS                                 | 0.38 | 1.72 |
| GOBP_PROTEIN_LOCALIZATION_TO_MITOCHONDRION                       | 0.35 | 1.69 |
| GOBP_CELLULAR_PROTEIN_CATABOLIC_PROCESS                          | 0.18 | 1.57 |
| GOBP_STEROID_BIOSYNTHETIC_PROCESS                                | 0.28 | 1.66 |
| GOBP_ORGANELLE_FUSION                                            | 0.37 | 1.71 |
| GOBP_ORGANELLE_MEMBRANE_FUSION                                   | 0.41 | 1.69 |
| GOBP_REGULATION_OF_CHROMOSOME_SEPARATION                         | 0.4  | 1.7  |
| GOBP_REGULATION_OF_CELL_CYCLE_G2_M_PHASE_TRANSITION              | 0.37 | 1.64 |
| GOBP_DNA_RECOMBINATION                                           | 0.22 | 1.6  |
| GOBP_DNA_INTEGRITY_CHECKPOINT_SIGNALING                          | 0.36 | 1.8  |
| GOBP_MICROTUBULE_ORGANIZING_CENTER_ORGANIZATION                  | 0.4  | 1.74 |
| GOBP_TRANSCRIPTION_BY_RNA_POLYMERASE_I                           | 0.39 | 1.62 |
| GOBP_NUCLEAR_EXPORT                                              | 0.29 | 1.6  |
| GOBP_POSITIVE_REGULATION_OF_CELL_CYCLE_PROCESS                   | 0.28 | 1.67 |
| GOBP_CHROMOSOME_SEPARATION                                       | 0.34 | 1.67 |
| GOBP_INTRACELLULAR_PROTEIN_TRANSPORT                             | 0.17 | 1.53 |
| GOBP_POSITIVE_REGULATION_OF_VIRAL_PROCESS                        | 0.39 | 1.65 |
| GOBP_REGULATION_OF_DNA_DEPENDENT_DNA_REPLICATION                 | 0.39 | 1.64 |
| GOBP_PROTEIN_MODIFICATION_BY_SMALL_PROTEIN_CONJUGATION           | 0.18 | 1.5  |
| GOBP_CELLULAR_NITROGEN_COMPOUND_CATABOLIC_PROCESS                | 0.21 | 1.56 |
| GOBP_RESPONSE_TO_ENDOPLASMIC_RETICULUM_STRESS                    | 0.24 | 1.56 |
| GOBP_REGULATION_OF_RESPONSE_TO_ENDOPLASMIC_RETICULUM_STRESS      | 0.39 | 1.6  |

**Table S2.** Biological processes in the Gene Ontology (GO) analysis of downregulated gene sets in nobiletin-treated HepG2 cells.

| Gene Sets Follow link to MsigDB                               | Enrichment Score (ES) | Nominal ES (NES) |
|---------------------------------------------------------------|-----------------------|------------------|
| GOBP_BIOLOGICAL_ADHESION                                      | -0.38                 | -3.86            |
| GOBP_ANIMAL_ORGAN_MORPHOGENESIS                               | -0.38                 | -3.38            |
| GOBP_REGULATION_OF_CELL_ADHESION                              | -0.38                 | -3.35            |
| GOBP_CELL_MIGRATION                                           | -0.32                 | -3.23            |
| GOBP_POSITIVE_REGULATION_OF_CELL_CELL_ADHESION                | -0.5                  | -3.22            |
| GOBP_REGULATION_OF_CELL_CELL_ADHESION                         | -0.42                 | -3.21            |
| GOBP_GLIOGENESIS                                              | -0.53                 | -3.17            |
| GOBP_GLIAL_CELL_DIFFERENTIATION                               | -0.56                 | -3.16            |
| GOBP_POSITIVE_REGULATION_OF_CELL_ADHESION                     | -0.44                 | -3.16            |
| GOBP_CELL_CELL_ADHESION                                       | -0.36                 | -3.15            |
| GOBP_LOCOMOTION                                               | -0.31                 | -3.15            |
| GOBP_PEPTIDYL_TYROSINE_MODIFICATION                           | -0.49                 | -3.14            |
| GOBP_TAXIS                                                    | -0.37                 | -3.1             |
| GOBP_NEURON_PROJECTION_GUIDANCE                               | -0.53                 | -3.09            |
| GOBP_CELL_MORPHOGENESIS_INVOLVED_IN_DIFFERENTIATION           | -0.38                 | -3.09            |
| GOBP_NEGATIVE_REGULATION_OF_MULTICELLULAR_ORGANISMAL_PROCESS  | -0.34                 | -3.08            |
| GOBP_EXTERNAL_ENCAPSULATING_STRUCTURE_ORGANIZATION            | -0.47                 | -3.08            |
| GOBP_POSITIVE_REGULATION_OF_LEUKOCYTE_CELL_CELL_ADHESION      | -0.51                 | -3.05            |
| GOBP_NEUROGENESIS                                             | -0.3                  | -3.04            |
| GOBP_REGULATION_OF_CELL_ACTIVATION                            | -0.38                 | -3.02            |
| GOBP_POSITIVE_REGULATION_OF_CELL_ACTIVATION                   | -0.44                 | -2.99            |
| GOBP_SODIUM_ION_TRANSPORT                                     | -0.53                 | -2.98            |
| GOBP_REGULATION_OF_PEPTIDYL_TYROSINE_PHOSPHORYLATION          | -0.52                 | -2.98            |
| GOBP_ANATOMICAL_STRUCTURE_FORMATION_INVOLVED_IN_MORPHOGENESIS | -0.31                 | -2.97            |
| GOBP_BLOOD_VESSEL_MORPHOGENESIS                               | -0.35                 | -2.96            |
| GOBP_AXON_DEVELOPMENT                                         | -0.41                 | -2.96            |
| GOBP_POSITIVE_REGULATION_OF_CELL_DIFFERENTIATION              | -0.33                 | -2.92            |
| GOBP_LEUKOCYTE_CELL_CELL_ADHESION                             | -0.41                 | -2.92            |
| GOBP_DEFENSE_RESPONSE_TO_BACTERIUM                            | -0.48                 | -2.91            |
| GOBP_DEFENSE_RESPONSE                                         | -0.28                 | -2.91            |
| GOBP_REGULATION_OF_CELL_DIFFERENTIATION                       | -0.29                 | -2.9             |
| GOBP_REGULATION_OF_CELL_POPULATION_PROLIFERATION              | -0.28                 | -2.89            |
| GOBP_MORPHOGENESIS_OF_AN_EPITHELIUM                           | -0.38                 | -2.88            |
| GOBP_REGULATION_OF_CELLULAR_COMPONENT_MOVEMENT                | -0.31                 | -2.87            |
| GOBP_CELL_MORPHOGENESIS                                       | -0.32                 | -2.87            |
| GOBP_HUMORAL_IMMUNE_RESPONSE                                  | -0.46                 | -2.87            |
| GOBP_CARBOXYLIC_ACID_TRANSPORT                                | -0.45                 | -2.87            |

|                                                               |       |       |
|---------------------------------------------------------------|-------|-------|
| GOBP_INFLAMMATORY_RESPONSE                                    | -0.33 | -2.85 |
| GOBP_NEURON_DIFFERENTIATION                                   | -0.29 | -2.83 |
| GOBP_ORGANIC_ACID_TRANSPORT                                   | -0.42 | -2.83 |
| GOBP_IMMUNE_RESPONSE                                          | -0.28 | -2.81 |
| GOBP_RESPONSE_TO_BACTERIUM                                    | -0.35 | -2.81 |
| GOBP_NEGATIVE_REGULATION_OF_CELL_POPULATION_PROLIFERATION     | -0.33 | -2.8  |
| GOBP_RESPONSE_TO_LIPID                                        | -0.31 | -2.79 |
| GOBP_METAL_ION_TRANSPORT                                      | -0.34 | -2.79 |
| GOBP_ENZYME_LINKED_RECEPTOR_PROTEIN_SIGNALING_PATHWAY         | -0.31 | -2.78 |
| GOBP_REGULATION_OF_MULTICELLULAR_ORGANISMAL_DEVELOPMENT       | -0.28 | -2.78 |
| GOBP_RESPONSE_TO_RETINOIC_ACID                                | -0.59 | -2.78 |
| GOBP_REGULATION_OF_LYMPHOCYTE_ACTIVATION                      | -0.37 | -2.77 |
| GOBP_TUBE_MORPHOGENESIS                                       | -0.31 | -2.77 |
| GOBP_ION_TRANSPORT                                            | -0.29 | -2.77 |
| GOBP_CELL_MORPHOGENESIS_INVOLVED_IN_NEURON_DIFFERENTIATION    | -0.38 | -2.77 |
| GOBP_POSITIVE_REGULATION_OF_IMMUNE_SYSTEM_PROCESS             | -0.31 | -2.76 |
| GOBP_TISSUE_DEVELOPMENT                                       | -0.26 | -2.74 |
| GOBP_TUBE_DEVELOPMENT                                         | -0.29 | -2.74 |
| GOBP_NEGATIVE_REGULATION_OF_RESPONSE_TO_WOUNDING              | -0.63 | -2.74 |
| GOBP_CELL_JUNCTION_ORGANIZATION                               | -0.34 | -2.73 |
| GOBP_G_PROTEIN_COUPLED_RECEPTOR_SIGNALING_PATHWAY             | -0.35 | -2.72 |
| GOBP_REGULATION_OF_T_CELL_ACTIVATION                          | -0.39 | -2.72 |
| GOBP_CIRCULATORY_SYSTEM_DEVELOPMENT                           | -0.28 | -2.71 |
| GOBP_REGULATION_OF_ANATOMICAL_STRUCTURE_MORPHOGENESIS         | -0.3  | -2.71 |
| GOBP_CIRCULATORY_SYSTEM_PROCESS                               | -0.36 | -2.71 |
| GOBP_POSITIVE_REGULATION_OF_DEVELOPMENTAL_PROCESS             | -0.28 | -2.7  |
| GOBP_NEURON_DEVELOPMENT                                       | -0.29 | -2.69 |
| GOBP_CELL_CELL_SIGNALING                                      | -0.28 | -2.69 |
| GOBP_POSITIVE_REGULATION_OF_MULTICELLULAR_ORGANISMAL_PROCESS  | -0.28 | -2.69 |
| GOBP_NEGATIVE_REGULATION_OF_WOUND_HEALING                     | -0.63 | -2.69 |
| GOBP_ORGANIC_HYDROXY_COMPOUND_TRANSPORT                       | -0.42 | -2.69 |
| GOBP_REGULATION_OF_TRANSMEMBRANE_TRANSPORT                    | -0.36 | -2.68 |
| GOBP_ERK1_AND_ERK2_CASCADE                                    | -0.41 | -2.67 |
| GOBP_ADAPTIVE_IMMUNE_RESPONSE                                 | -0.37 | -2.67 |
| GOBP_ANION_TRANSPORT                                          | -0.35 | -2.67 |
| GOBP_VASCULATURE_DEVELOPMENT                                  | -0.31 | -2.66 |
| GOBP_OSTEOCLAST_DIFFERENTIATION                               | -0.63 | -2.66 |
| GOBP_NEGATIVE_REGULATION_OF_COAGULATION                       | -0.63 | -2.65 |
| GOBP_REGULATION_OF_IMMUNE_SYSTEM_PROCESS                      | -0.26 | -2.65 |
| GOBP_POSITIVE_REGULATION_OF_PEPTIDYL_TYROSINE_PHOSPHORYLATION | -0.53 | -2.64 |
| GOBP_CELL_SUBSTRATE_ADHESION                                  | -0.36 | -2.64 |

|                                                                     |       |       |
|---------------------------------------------------------------------|-------|-------|
| GOBP_POSITIVE_REGULATION_OF_ION_TRANSPORT                           | -0.44 | -2.62 |
| GOBP_POSITIVE_REGULATION_OF_CELL_JUNCTION_ASSEMBLY                  | -0.62 | -2.62 |
| GOBP_EPITHELIAL_CELL_PROLIFERATION                                  | -0.36 | -2.61 |
| GOBP_POSITIVE_REGULATION_OF_TRANSPORT                               | -0.3  | -2.61 |
| GOBP_SODIUM_ION_TRANSMEMBRANE_TRANSPORT                             | -0.54 | -2.6  |
| GOBP_REGULATION_OF_ION_TRANSPORT                                    | -0.34 | -2.6  |
| GOBP_NEGATIVE_REGULATION_OF_LOCOMOTION                              | -0.39 | -2.59 |
| GOBP_IMMUNE_EFFECTOR_PROCESS                                        | -0.32 | -2.58 |
| GOBP_ORGANIC_ANION_TRANSPORT                                        | -0.37 | -2.58 |
| GOBP_TISSUE_MORPHOGENESIS                                           | -0.32 | -2.56 |
| GOBP_LIPID_LOCALIZATION                                             | -0.34 | -2.56 |
| GOBP_CELL_ACTIVATION                                                | -0.27 | -2.55 |
| GOBP_POSITIVE_REGULATION_OF_SECRETION                               | -0.39 | -2.55 |
| GOBP_REGULATION_OF_RESPONSE_TO_EXTERNAL_STIMULUS                    | -0.28 | -2.55 |
| GOBP_HUMORAL_IMMUNE_RESPONSE_MEDIATED_BY_CIRCULATING_IMMUNOGLOBULIN | -0.59 | -2.54 |
| GOBP_NEGATIVE_REGULATION_OF_RESPONSE_TO_EXTERNAL_STIMULUS           | -0.36 | -2.54 |
| GOBP_REGULATION_OF_IMMUNE_EFFECTOR_PROCESS                          | -0.38 | -2.53 |
| GOBP_DEFENSE_RESPONSE_TO_GRAM_POSITIVE_BACTERIUM                    | -0.61 | -2.53 |
| GOBP_NEGATIVE_REGULATION_OF_CYTOKINE_PRODUCTION                     | -0.43 | -2.52 |
| GOBP_CELL_PART_MORPHOGENESIS                                        | -0.32 | -2.52 |
| GOBP_CELLULAR_COMPONENT_MORPHOGENESIS                               | -0.32 | -2.52 |
| GOBP_REGULATION_OF_SECRETION                                        | -0.32 | -2.52 |
| GOBP_REGULATION_OF_RESPONSE_TO_WOUNDING                             | -0.47 | -2.52 |
| GOBP_POSITIVE_REGULATION_OF_PHOSPHORUS_METABOLIC_PROCESS            | -0.28 | -2.52 |
| GOBP_COLLAGEN_METABOLIC_PROCESS                                     | -0.55 | -2.51 |
| GOBP_REGULATION_OF_SIGNALING_RECEPTOR_ACTIVITY                      | -0.54 | -2.51 |
| GOBP_INTERLEUKIN_6_PRODUCTION                                       | -0.52 | -2.51 |
| GOBP_POSITIVE_REGULATION_OF_CELL_POPULATION_PROLIFERATION           | -0.28 | -2.51 |
| GOBP_GLIAL_CELL_DEVELOPMENT                                         | -0.57 | -2.51 |
| GOBP_REGULATION_OF_IMMUNE_RESPONSE                                  | -0.28 | -2.5  |
| GOBP_CATION_TRANSPORT                                               | -0.28 | -2.49 |
| GOBP_SYNAPSE_ORGANIZATION                                           | -0.37 | -2.49 |
| GOBP_NERVOUS_SYSTEM_PROCESS                                         | -0.29 | -2.48 |
| GOBP_NEGATIVE_REGULATION_OF_CELL_DIFFERENTIATION                    | -0.31 | -2.48 |
| GOBP_NEGATIVE_REGULATION_OF_CELL_ADHESION                           | -0.39 | -2.48 |
| GOBP_EPITHELIUM_DEVELOPMENT                                         | -0.26 | -2.48 |
| GOBP_REGULATION_OF_CELL_JUNCTION_ASSEMBLY                           | -0.47 | -2.48 |
| GOBP_HORMONE_METABOLIC_PROCESS                                      | -0.39 | -2.47 |
| GOBP_RESPONSE_TO_OXYGEN_CONTAINING_COMPOUND                         | -0.24 | -2.47 |
| GOBP_REGULATION_OF_LEUKOCYTE_DIFFERENTIATION                        | -0.38 | -2.46 |
| GOBP_ODONTOGENESIS                                                  | -0.56 | -2.45 |

|                                                                       |       |       |
|-----------------------------------------------------------------------|-------|-------|
| GOBP_REGULATION_OF_ION_TRANSMEMBRANE_TRANSPORT                        | -0.35 | -2.44 |
| GOBP_ANATOMICAL_STRUCTURE_HOMEOSTASIS                                 | -0.38 | -2.43 |
| GOBP_T_CELL_ACTIVATION                                                | -0.31 | -2.43 |
| GOBP_NEGATIVE_REGULATION_OF_CELL_DEVELOPMENT                          | -0.49 | -2.42 |
| GOBP_REGULATION_OF_BLOOD_PRESSURE                                     | -0.48 | -2.42 |
| GOBP_AMEBOIDAL_TYPE_CELL_MIGRATION                                    | -0.33 | -2.42 |
| GOBP_POSITIVE_REGULATION_OF_MAPK_CASCADE                              | -0.32 | -2.41 |
| GOBP_REGULATION_OF_HORMONE_LEVELS                                     | -0.31 | -2.4  |
| GOBP_LYMPHOCYTE_ACTIVATION                                            | -0.28 | -2.4  |
| GOBP_CELL_JUNCTION_ASSEMBLY                                           | -0.35 | -2.4  |
| GOBP_POSITIVE_REGULATION_OF_IMMUNE_RESPONSE                           | -0.3  | -2.4  |
| GOBP_EMBRYONIC_MORPHOGENESIS                                          | -0.29 | -2.37 |
| GOBP_CELL_CELL_ADHESION_VIA_PLASMA_MEMBRANE_ADHESION_MOLECULES        | -0.43 | -2.37 |
| GOBP_LEUKOCYTE_DIFFERENTIATION                                        | -0.3  | -2.37 |
| GOBP_DETECTION_OF_STIMULUS                                            | -0.38 | -2.36 |
| GOBP_CELL_MATRIX_ADHESION                                             | -0.38 | -2.36 |
| GOBP_POSITIVE_REGULATION_OF_ERK1_AND_ERK2_CASCADE                     | -0.43 | -2.36 |
| GOBP_LYMPHOCYTE_MEDIATED_IMMUNITY                                     | -0.37 | -2.36 |
| GOBP_REGULATION_OF_NERVOUS_SYSTEM_DEVELOPMENT                         | -0.35 | -2.36 |
| GOBP_CELLULAR_RESPONSE_TO_LIPID                                       | -0.32 | -2.35 |
| GOBP_LEUKOCYTE_PROLIFERATION                                          | -0.36 | -2.35 |
| GOBP_ACTIVATION_OF_IMMUNE_RESPONSE                                    | -0.36 | -2.35 |
| GOBP_MORPHOGENESIS_OF_A_BRANCHING_STRUCTURE                           | -0.44 | -2.34 |
| GOBP_CELLULAR_RESPONSE_TO_OXYGEN_CONTAINING_COMPOUND                  | -0.25 | -2.34 |
| GOBP_SKELETAL_SYSTEM_DEVELOPMENT                                      | -0.31 | -2.34 |
| GOBP_B_CELL_MEDIATED_IMMUNITY                                         | -0.42 | -2.34 |
| GOBP_NEGATIVE_REGULATION_OF_DEVELOPMENTAL_PROCESS                     | -0.26 | -2.34 |
| GOBP_BIOMINERALIZATION                                                | -0.48 | -2.33 |
| GOBP_RESPONSE_TO_MOLECULE_OF_BACTERIAL_ORIGIN                         | -0.36 | -2.33 |
| GOBP_SYNAPSE_ASSEMBLY                                                 | -0.5  | -2.33 |
| GOBP_REGULATION_OF_PROTEIN_PHOSPHORYLATION                            | -0.25 | -2.32 |
| GOBP_HEART_MORPHOGENESIS                                              | -0.38 | -2.32 |
| GOBP_OSSIFICATION                                                     | -0.33 | -2.32 |
| GOBP_POSITIVE_REGULATION_OF_PROTEIN_PHOSPHORYLATION                   | -0.27 | -2.31 |
| GOBP_ARTERY_DEVELOPMENT                                               | -0.47 | -2.31 |
| GOBP_POSITIVE_REGULATION_OF_CELL_DEVELOPMENT                          | -0.38 | -2.3  |
| GOBP_NEGATIVE_REGULATION_OF_CELL_CELL_ADHESION                        | -0.4  | -2.3  |
| GOBP_TRANSMEMBRANE_RECEPTOR_PROTEIN_TYROSINE_KINASE_SIGNALING_PATHWAY | -0.3  | -2.3  |
| GOBP_HORMONE_TRANSPORT                                                | -0.36 | -2.3  |
| GOBP_REGULATION_OF_SYNAPSE_STRUCTURE_OR_ACTIVITY                      | -0.43 | -2.3  |
| GOBP_REGULATION_OF_CELL_SUBSTRATE_ADHESION                            | -0.39 | -2.29 |



|                                                                                   |       |       |
|-----------------------------------------------------------------------------------|-------|-------|
| GOBP_POSITIVE_REGULATION_OF_IMMUNE_EFFECTOR_PROCESS                               | -0.38 | -2.29 |
| GOBP_POSITIVE_REGULATION_OF_LOCOMOTION                                            | -0.28 | -2.28 |
| GOBP_HEART_DEVELOPMENT                                                            | -0.28 | -2.28 |
| GOBP_REGULATION_OF_PHOSPHORUS_METABOLIC_PROCESS                                   | -0.23 | -2.28 |
| GOBP_MACROPHAGE_ACTIVATION                                                        | -0.53 | -2.28 |
| GOBP_VASCULAR_PROCESS_IN_CIRCULATORY_SYSTEM                                       | -0.36 | -2.27 |
| GOBP_LEUKOCYTE_MEDIATED_IMMUNITY                                                  | -0.32 | -2.27 |
| GOBP_REGULATION_OF_CELL_PROJECTION_ORGANIZATION                                   | -0.29 | -2.26 |
| GOBP_STEROL_HOMEOSTASIS                                                           | -0.5  | -2.26 |
| GOBP_REGULATION_OF_WOUND_HEALING                                                  | -0.44 | -2.26 |
| GOBP_EXPORT_FROM_CELL                                                             | -0.26 | -2.25 |
| GOBP_CELL_SURFACE_RECEPTOR_SIGNALING_PATHWAY<br>_INVOLVED_IN_CELL_CELL_SIGNALING  | -0.3  | -2.25 |
| GOBP_RESPONSE_TO_ALCOHOL                                                          | -0.38 | -2.24 |
| GOBP_REGULATION_OF_CELL_DEVELOPMENT                                               | -0.32 | -2.24 |
| GOBP_REGULATION_OF_ANIMAL_ORGAN_MORPHOGENESIS                                     | -0.52 | -2.24 |
| GOBP_ENDODERM_DEVELOPMENT                                                         | -0.54 | -2.24 |
| GOBP_REGULATION_OF_LEUKOCYTE_PROLIFERATION                                        | -0.37 | -2.24 |
| GOBP_CELL_PROJECTION_ORGANIZATION                                                 | -0.24 | -2.24 |
| GOBP_INORGANIC_ION_TRANSMEMBRANE_TRANSPORT                                        | -0.27 | -2.23 |
| GOBP_ION_TRANSMEMBRANE_TRANSPORT                                                  | -0.26 | -2.23 |
| GOBP_APPENDAGE_DEVELOPMENT                                                        | -0.42 | -2.23 |
| GOBP_REGULATION_OF_HEMOPOIESIS                                                    | -0.31 | -2.23 |
| GOBP_POSITIVE_REGULATION_OF_TRANSMEMBRANE_TRANSPORT                               | -0.43 | -2.23 |
| GOBP_SECRETION                                                                    | -0.25 | -2.21 |
| GOBP_DEFENSE_RESPONSE_TO_OTHER_ORGANISM                                           | -0.24 | -2.21 |
| GOBP_BEHAVIOR                                                                     | -0.3  | -2.2  |
| GOBP_NEGATIVE_REGULATION_OF_CELL_ACTIVATION                                       | -0.39 | -2.2  |
| GOBP_BIOLOGICAL_PROCESS_INVOLVED_IN_INTERSPECIES<br>INTERACTION_BETWEEN_ORGANISMS | -0.22 | -2.2  |
| GOBP_REGULATION_OF_MYELOID_LEUKOCYTE_DIFFERENTIATION                              | -0.45 | -2.2  |
| GOBP_ENDOTHELIAL_CELL_MIGRATION                                                   | -0.38 | -2.19 |
| GOBP_RESPONSE_TO_MECHANICAL_STIMULUS                                              | -0.38 | -2.19 |
| GOBP_SIGNAL_RELEASE                                                               | -0.31 | -2.19 |
| GOBP_REGULATION_OF_PHOSPHATIDYLINOSITOL_3_KINASE_SIGNALING                        | -0.52 | -2.18 |
| GOBP_STRIATED_MUSCLE_CONTRACTION                                                  | -0.49 | -2.18 |
| GOBP_INORGANIC_ANION_TRANSPORT                                                    | -0.41 | -2.18 |
| GOBP_RESPONSE_TO_WOUNDING                                                         | -0.26 | -2.18 |
| GOBP_POSITIVE_REGULATION_OF_CELLULAR_COMPONENT_BIOGENESIS                         | -0.31 | -2.17 |
| GOBP_REGULATION_OF_LEUKOCYTE_MEDIATED_IMMUNITY                                    | -0.37 | -2.17 |
| GOBP_REGULATION_OF_T_CELL_DIFFERENTIATION                                         | -0.42 | -2.17 |
| GOBP_MAPK_CASCADE                                                                 | -0.26 | -2.17 |
| GOBP_APPENDAGE_MORPHOGENESIS                                                      | -0.41 | -2.17 |

|                                                                         |       |       |
|-------------------------------------------------------------------------|-------|-------|
| GOBP_EPIDERMIS_DEVELOPMENT                                              | -0.31 | -2.17 |
| GOBP_EPITHELIAL_CELL_DIFFERENTIATION                                    | -0.25 | -2.16 |
| GOBP_MULTICELLULAR_ORGANISMAL_HOMEOSTASIS                               | -0.3  | -2.16 |
| GOBP_REGULATION_OF_OSSIFICATION                                         | -0.44 | -2.14 |
| GOBP_REGULATION_OF_CYTOSOLIC_CALCIUM_ION_CONCENTRATION                  | -0.34 | -2.13 |
| GOBP_EMBRYONIC_ORGAN_DEVELOPMENT                                        | -0.28 | -2.11 |
| GOBP_RESPONSE_TO_OXYGEN_LEVELS                                          | -0.32 | -2.11 |
| GOBP_KIDNEY_EPITHELIUM_DEVELOPMENT                                      | -0.47 | -2.11 |
| GOBP_TRANSMEMBRANE_TRANSPORT                                            | -0.22 | -2.11 |
| GOBP_REGULATION_OF_ANATOMICAL_STRUCTURE_SIZE                            | -0.28 | -2.1  |
| GOBP_REGULATION_OF_METAL_ION_TRANSPORT                                  | -0.33 | -2.1  |
| GOBP_ENTRY_INTO_HOST                                                    | -0.43 | -2.1  |
| GOBP_NEGATIVE_REGULATION_OF_MOLECULAR_FUNCTION                          | -0.23 | -2.1  |
| GOBP_POSITIVE_REGULATION_OF_KINASE_ACTIVITY                             | -0.28 | -2.1  |
| GOBP_IMMUNE_RESPONSE_REGULATING_CELL_SURFACE_RECEPTOR_SIGNALING_PATHWAY | -0.37 | -2.1  |
| GOBP_EYE_MORPHOGENESIS                                                  | -0.44 | -2.1  |
| GOBP_REGULATION_OF_NEURON_PROJECTION_DEVELOPMENT                        | -0.31 | -2.09 |
| GOBP_INTERFERON_GAMMA_PRODUCTION                                        | -0.5  | -2.09 |
| GOBP_REGULATION_OF_TRANSPORTER_ACTIVITY                                 | -0.36 | -2.09 |
| GOBP_COGNITION                                                          | -0.35 | -2.08 |
| GOBP_HOMEOSTATIC_PROCESS                                                | -0.2  | -2.08 |
| GOBP_GLAND_MORPHOGENESIS                                                | -0.41 | -2.08 |
| GOBP_POSITIVE_REGULATION_OF_SIGNALING                                   | -0.21 | -2.08 |
| GOBP_CYTOKINE_PRODUCTION                                                | -0.26 | -2.08 |
| GOBP_EPITHELIAL_TUBE_MORPHOGENESIS                                      | -0.31 | -2.06 |
| GOBP_ENDOTHELIAL_CELL_PROLIFERATION                                     | -0.39 | -2.05 |
| GOBP_REGULATION_OF_HYDROLASE_ACTIVITY                                   | -0.22 | -2.03 |
| GOBP_SECOND_MESSENGER_MEDIATED_SIGNALING                                | -0.35 | -2    |
| GOBP_RESPONSE_TO_ENDOGENOUS_STIMULUS                                    | -0.19 | -1.98 |
| GOBP_RESPONSE_TO_INTERFERON_GAMMA                                       | -0.41 | -1.98 |
| GOBP_NEGATIVE_REGULATION_OF_RESPONSE_TO_STIMULUS                        | -0.2  | -1.96 |
| GOBP_POSITIVE_REGULATION_OF_CELLULAR_COMPONENT_ORGANIZATION             | -0.22 | -1.93 |
| GOBP_NEGATIVE_REGULATION_OF_SECRETION                                   | -0.4  | -1.9  |
| GOBP_CELLULAR_RESPONSE_TO_ENDOGENOUS_STIMULUS                           | -0.19 | -1.86 |
| GOBP_REGULATION_OF_PROTEIN_MODIFICATION_PROCESS                         | -0.17 | -1.76 |
| GOBP_POTASSIUM_ION_TRANSPORT                                            | -0.59 | -2.84 |
| GOBP_NEGATIVE_REGULATION_OF_NERVOUS_SYSTEM_DEVELOPMENT                  | -0.51 | -2.46 |
| GOBP_CARDIOCYTE_DIFFERENTIATION                                         | -0.49 | -2.42 |
| GOBP_SENSORY_PERCEPTION                                                 | -0.32 | -2.37 |
| GOBP_REGULATION_OF_MAP_KINASE_ACTIVITY                                  | -0.46 | -2.35 |
| GOBP_POSITIVE_REGULATION_OF_HEMOPOIESIS                                 | -0.46 | -2.35 |

|                                                                                                                                |       |       |
|--------------------------------------------------------------------------------------------------------------------------------|-------|-------|
| GOBP_REGULATION_OF_FAT_CELL_DIFFERENTIATION                                                                                    | -0.48 | -2.32 |
| GOBP_COMPLEMENT_ACTIVATION                                                                                                     | -0.53 | -2.28 |
| GOBP_RESPONSE_TO_ETHANOL                                                                                                       | -0.53 | -2.28 |
| GOBP_SENSORY_PERCEPTION_OF_CHEMICAL_STIMULUS                                                                                   | -0.55 | -2.28 |
| GOBP_POSITIVE_REGULATION_OF_NERVOUS_SYSTEM_DEVELOPMENT                                                                         | -0.39 | -2.26 |
| GOBP_ACTIN_FILAMENT_BASED_PROCESS                                                                                              | -0.27 | -2.25 |
| GOBP_FORMATION_OF_PRIMARY_GERM_LAYER                                                                                           | -0.44 | -2.24 |
| GOBP_EPITHELIAL_CELL_DEVELOPMENT                                                                                               | -0.37 | -2.24 |
| GOBP_ARTERY_MORPHOGENESIS                                                                                                      | -0.5  | -2.24 |
| GOBP_POSITIVE_REGULATION_OF_LIPID_METABOLIC_PROCESS                                                                            | -0.47 | -2.23 |
| GOBP_IMPORT_ACROSS_PLASMA_MEMBRANE                                                                                             | -0.41 | -2.2  |
| GOBP_POSITIVE_REGULATION_OF_HORMONE_SECRETION                                                                                  | -0.48 | -2.2  |
| GOBP_CELL_CHEMOTAXIS                                                                                                           | -0.33 | -2.19 |
| GOBP_MYELOID_LEUKOCYTE_DIFFERENTIATION                                                                                         | -0.36 | -2.19 |
| GOBP_ENDOCYTOSIS                                                                                                               | -0.29 | -2.18 |
| GOBP_CELLULAR_RESPONSE_TO_INTERFERON_GAMMA                                                                                     | -0.48 | -2.17 |
| GOBP_VASCULOGENESIS                                                                                                            | -0.46 | -2.17 |
| GOBP_RESPONSE_TO_CORTICOSTEROID                                                                                                | -0.43 | -2.16 |
| GOBP_IMPORT_INTO_CELL                                                                                                          | -0.39 | -2.16 |
| GOBP_ADAPTIVE_IMMUNE_RESPONSE_BASED_ON_SOMATIC_RECOMBINATION_OF_IMMUNE_RECEPTORS_BUILT_FROM_IMMUNOGLOBULIN_SUPERFAMILY_DOMAINS | -0.33 | -2.16 |
| GOBP_T_CELL_PROLIFERATION                                                                                                      | -0.37 | -2.16 |
| GOBP_MONOCARBOXYLIC_ACID_TRANSPORT                                                                                             | -0.49 | -2.16 |
| GOBP_RESPONSE_TO_INTERLEUKIN_1                                                                                                 | -0.48 | -2.16 |
| GOBP_CELL_FATE_COMMITMENT                                                                                                      | -0.38 | -2.15 |
| GOBP_PATTERN_SPECIFICATION_PROCESS                                                                                             | -0.3  | -2.14 |
| GOBP_AMINO_ACID_TRANSPORT                                                                                                      | -0.45 | -2.13 |
| GOBP_REGULATION_OF_CHEMOTAXIS                                                                                                  | -0.35 | -2.13 |
| GOBP_TISSUE_REMODELING                                                                                                         | -0.42 | -2.11 |
| GOBP_DICARBOXYLIC_ACID_TRANSPORT                                                                                               | -0.48 | -2.11 |
| GOBP_POSITIVE_REGULATION_OF_EPITHELIAL_CELL_PROLIFERATION                                                                      | -0.38 | -2.11 |
| GOBP_SENSORY_ORGAN_DEVELOPMENT                                                                                                 | -0.27 | -2.1  |
| GOBP_NEGATIVE_REGULATION_OF_PEPTIDASE_ACTIVITY                                                                                 | -0.35 | -2.1  |
| GOBP_CELLULAR_RESPONSE_TO_INTERLEUKIN_1                                                                                        | -0.46 | -2.1  |
| GOBP_SENSORY_ORGAN_MORPHOGENESIS                                                                                               | -0.36 | -2.09 |
| GOBP_REGULATION_OF_MEMBRANE_POTENTIAL                                                                                          | -0.35 | -2.09 |
| GOBP_REGULATION_OF_TRANSMEMBRANE_RECEPTOR_PROTEIN_SERINE_THREONINE_KINASE_SIGNALING_PATHWAY                                    | -0.34 | -2.08 |
| GOBP_INNATE_IMMUNE_RESPONSE                                                                                                    | -0.25 | -2.08 |
| GOBP_PHOSPHATIDYLINOSITOL_3_KINASE_SIGNALING                                                                                   | -0.43 | -2.06 |
| GOBP_REGULATION_OF_HORMONE_SECRETION                                                                                           | -0.36 | -2.06 |
| GOBP_ANION_TRANSMEMBRANE_TRANSPORT                                                                                             | -0.35 | -2.06 |

|                                                               |       |       |
|---------------------------------------------------------------|-------|-------|
| GOBP_HEART_PROCESS                                            | -0.41 | -2.05 |
| GOBP_RESPONSE_TO_XENOBIOTIC_STIMULUS                          | -0.28 | -2.05 |
| GOBP_CANONICAL_WNT_SIGNALING_PATHWAY                          | -0.34 | -2.04 |
| GOBP_CELLULAR_RESPONSE_TO_BIOTIC_STIMULUS                     | -0.34 | -2.03 |
| GOBP_POSITIVE_REGULATION_OF_INTERLEUKIN_6_PRODUCTION          | -0.49 | -2.03 |
| GOBP_REGULATION_OF_CELL_MORPHOGENESIS                         | -0.33 | -2.02 |
| GOBP_NEGATIVE_REGULATION_OF_CATALYTIC_ACTIVITY                | -0.24 | -2.01 |
| GOBP_MONONUCLEAR_CELL_DIFFERENTIATION                         | -0.27 | -2.01 |
| GOBP_CATION_TRANSMEMBRANE_TRANSPORT                           | -0.25 | -2    |
| GOBP_MUSCLE_CELL_PROLIFERATION                                | -0.34 | -1.98 |
| GOBP_REGULATION_OF_EPITHELIAL_CELL_MIGRATION                  | -0.32 | -1.98 |
| GOBP_EMBRYONIC_ORGAN_MORPHOGENESIS                            | -0.32 | -1.97 |
| GOBP_INOSITOL_LIPID_MEDIATED_SIGNALING                        | -0.37 | -1.96 |
| GOBP_ACTIN_FILAMENT_BUNDLE_ORGANIZATION                       | -0.43 | -1.95 |
| GOBP_CALCITUM_MEDIATED_SIGNALING                              | -0.42 | -1.94 |
| GOBP_SUBSTRATE_ADHESION_DEPENDENT_CELL_SPREADING              | -0.41 | -1.94 |
| GOBP_CENTRAL_NERVOUS_SYSTEM_DEVELOPMENT                       | -0.22 | -1.94 |
| GOBP_CHEMICAL_HOMEOSTASIS                                     | -0.21 | -1.93 |
| GOBP_REGULATION_OF_TRANSPORT                                  | -0.19 | -1.93 |
| GOBP_REGULATION_OF_SYSTEM_PROCESS                             | -0.27 | -1.92 |
| GOBP_CELL_CELL_SIGNALING_BY_WNT                               | -0.27 | -1.92 |
| GOBP_CELLULAR_HOMEOSTASIS                                     | -0.23 | -1.92 |
| GOBP_TISSUE_MIGRATION                                         | -0.29 | -1.91 |
| GOBP_NEGATIVE_REGULATION_OF_HYDROLASE_ACTIVITY                | -0.27 | -1.9  |
| GOBP_PHOSPHORYLATION                                          | -0.18 | -1.9  |
| GOBP_POSITIVE_REGULATION_OF_INTRACELLULAR_SIGNAL_TRANSDUCTION | -0.2  | -1.88 |
| GOBP_UROGENITAL_SYSTEM_DEVELOPMENT                            | -0.29 | -1.86 |
| GOBP_RESPONSE_TO_HORMONE                                      | -0.21 | -1.83 |
| GOBP_SENSORY_SYSTEM_DEVELOPMENT                               | -0.27 | -1.81 |
| GOBP_REGULATION_OF_LYMPHOCYTE_DIFFERENTIATION                 | -0.41 | -2.24 |
| GOBP_POSITIVE_REGULATION_OF_EXOCYTOSIS                        | -0.53 | -2.2  |
| GOBP_CELLULAR_HORMONE_METABOLIC_PROCESS                       | -0.43 | -2.2  |
| GOBP_ACTION_POTENTIAL                                         | -0.53 | -2.2  |
| GOBP_REGULATION_OF_COAGULATION                                | -0.45 | -2.16 |
| GOBP_FAT_CELL_DIFFERENTIATION                                 | -0.35 | -2.14 |
| GOBP_POSITIVE_REGULATION_OF_MAP_KINASE_ACTIVITY               | -0.48 | -2.14 |
| GOBP_MULTI_MULTICELLULAR_ORGANISM_PROCESS                     | -0.36 | -2.13 |
| GOBP_REGULATION_OF_LIPID_LOCALIZATION                         | -0.38 | -2.12 |
| GOBP_REGULATION_OF_T_CELL_PROLIFERATION                       | -0.39 | -2.11 |
| GOBP_SPECIFICATION_OF_SYMMETRY                                | -0.45 | -2.09 |
| GOBP_REGULATION_OF_NEUROGENESIS                               | -0.32 | -2.09 |

|                                                                                   |       |       |
|-----------------------------------------------------------------------------------|-------|-------|
| GOBP_REGULATION_OF_HEART_CONTRACTION                                              | -0.45 | -2.09 |
| GOBP_HOMOPHILIC_CELL_ADHESION_VIA_PLASMA<br>_MEMBRANE_ADHESION_MOLECULES          | -0.48 | -2.08 |
| GOBP_CELLULAR_RESPONSE_TO_MOLECULE_OF_BACTERIAL_ORIGIN                            | -0.38 | -2.07 |
| GOBP_REGULATION_OF_BLOOD_CIRCULATION                                              | -0.38 | -2.06 |
| GOBP_CENTRAL_NERVOUS_SYSTEM_NEURON_DIFFERENTIATION                                | -0.45 | -2.06 |
| GOBP_IMMUNE_RESPONSE_REGULATING_SIGNALING_PATHWAY                                 | -0.29 | -2.04 |
| GOBP_CARDIAC_SEPTUM_DEVELOPMENT                                                   | -0.43 | -2.04 |
| GOBP_PHAGOCYTOSIS                                                                 | -0.31 | -2.03 |
| GOBP_REGULATION_OF_GTPASE_ACTIVITY                                                | -0.29 | -2.03 |
| GOBP_NEGATIVE_REGULATION_OF_EPITHELIAL_CELL_MIGRATION                             | -0.47 | -2.02 |
| GOBP_ORGANIC_ACID_TRANSMEMBRANE_TRANSPORT                                         | -0.38 | -2    |
| GOBP_REGULATION_OF_EXOCYTOSIS                                                     | -0.37 | -1.99 |
| GOBP_NEUTROPHIL_MIGRATION                                                         | -0.4  | -1.98 |
| GOBP_LEUKOCYTE_MIGRATION                                                          | -0.28 | -1.97 |
| GOBP_NEGATIVE_REGULATION_OF_PROTEOLYSIS                                           | -0.3  | -1.97 |
| GOBP_TRANSMEMBRANE_RECEPTOR_PROTEIN_SERINE_THREONINE<br>_KINASE_SIGNALING_PATHWAY | -0.3  | -1.97 |
| GOBP_STEROL_TRANSPORT                                                             | -0.4  | -1.97 |
| GOBP_EMBRYONIC_APPENDAGE_MORPHOGENESIS                                            | -0.41 | -1.96 |
| GOBP_CARDIAC_MUSCLE_CELL_DIFFERENTIATION                                          | -0.47 | -1.95 |
| GOBP_SMOOTH_MUSCLE_CELL_PROLIFERATION                                             | -0.38 | -1.95 |
| GOBP_MYELOID_LEUKOCYTE_ACTIVATION                                                 | -0.32 | -1.88 |
| GOBP_RESPONSE_TO_PEPTIDE                                                          | -0.25 | -1.85 |
| GOBP_POSITIVE_REGULATION_OF_PROTEIN_MODIFICATION_PROCESS                          | -0.2  | -1.8  |
| GOBP_RESPONSE_TO_BMP                                                              | -0.39 | -2.08 |
| GOBP_CELL_CELL_JUNCTION_ORGANIZATION                                              | -0.41 | -2.07 |
| GOBP_REGULATION_OF_BIOMINERALIZATION                                              | -0.49 | -2.04 |
| GOBP_REGULATION_OF_ENDOTHELIAL_CELL_MIGRATION                                     | -0.38 | -2.03 |
| GOBP_REGULATION_OF_TUBE_SIZE                                                      | -0.4  | -2.03 |
| GOBP_DIGESTION                                                                    | -0.4  | -2    |
| GOBP_REGENERATION                                                                 | -0.35 | -1.99 |
| GOBP_REGULATION_OF_VASCULATURE_DEVELOPMENT                                        | -0.3  | -1.98 |
| GOBP_POSITIVE_REGULATION_OF_T_CELL_PROLIFERATION                                  | -0.43 | -1.97 |
| GOBP_POSITIVE_REGULATION_OF_NEUROGENESIS                                          | -0.36 | -1.95 |
| GOBP_SPROUTING_ANGIOGENESIS                                                       | -0.42 | -1.94 |
| GOBP_CALCIIUM_ION_TRANSPORT                                                       | -0.3  | -1.92 |
| GOBP_T_CELL_DIFFERENTIATION                                                       | -0.29 | -1.91 |
| GOBP_MESENCHYMAL_CELL_DEVELOPMENT                                                 | -0.43 | -1.91 |
| GOBP_POSITIVE_REGULATION_OF_ION_TRANSMEMBRANE_TRANSPORT                           | -0.39 | -1.91 |
| GOBP_POSITIVE_REGULATION_OF_SMALL_MOLECULE_METABOLIC_PROCESS                      | -0.41 | -1.9  |
| GOBP_CELL_FATE_SPECIFICATION                                                      | -0.43 | -1.89 |
| GOBP_RESPONSE_TO_CALCIIUM_ION                                                     | -0.37 | -1.89 |

|                                                                                                      |       |       |
|------------------------------------------------------------------------------------------------------|-------|-------|
| GOBP_CELLULAR_RESPONSE_TO_XENOBIOTIC_STIMULUS                                                        | -0.36 | -1.89 |
| GOBP_REGULATION_OF_CATION_CHANNEL_ACTIVITY                                                           | -0.43 | -1.86 |
| GOBP_REGULATION_OF_CELLULAR_COMPONENT_BIOGENESIS                                                     | -0.21 | -1.84 |
| GOBP_REGULATION_OF_JNK_CASCADE                                                                       | -0.36 | -1.81 |
| GOBP_MONOCARBOXYLIC_ACID_METABOLIC_PROCESS                                                           | -0.22 | -1.81 |
| GOBP_STEROID_METABOLIC_PROCESS                                                                       | -0.25 | -1.8  |
| GOBP_STRIATED_MUSCLE_CELL_DIFFERENTIATION                                                            | -0.32 | -1.8  |
| GOBP_BLOOD_VESSEL_ENDOTHELIAL_CELL_MIGRATION                                                         | -0.45 | -1.95 |
| GOBP_TUMOR_NECROSIS_FACTOR_SUPERFAMILY_CYTOKINE_PRODUCTION                                           | -0.36 | -1.86 |
| GOBP_NEGATIVE_REGULATION_OF_SIGNALING                                                                | -0.19 | -1.77 |
| GOBP_REGULATION_OF_CATION_TRANSMEMBRANE_TRANSPORT                                                    | -0.32 | -1.99 |
| GOBP_POSITIVE_REGULATION_OF_TRANSMEMBRANE_RECEPTOR_PROTEIN_SERINE_THREONINE_KINASE_SIGNALING_PATHWAY | -0.4  | -1.99 |
| GOBP_REGULATION_OF_LIPID_TRANSPORT                                                                   | -0.37 | -1.96 |
| GOBP_MOLTING_CYCLE                                                                                   | -0.44 | -1.95 |
| GOBP_FATTY_ACID_TRANSPORT                                                                            | -0.45 | -1.94 |
| GOBP_ACTOMYOSIN_STRUCTURE_ORGANIZATION                                                               | -0.36 | -1.89 |
| GOBP_CELL_CELL_JUNCTION_ASSEMBLY                                                                     | -0.43 | -1.89 |
| GOBP_NEURAL_CREST_CELL_DIFFERENTIATION                                                               | -0.45 | -1.88 |
| GOBP_SENSORY_PERCEPTION_OF_PAIN                                                                      | -0.45 | -1.88 |
| GOBP_ALPHA_BETA_T_CELL_ACTIVATION                                                                    | -0.4  | -1.88 |
| GOBP_RESPONSE_TO_CAMP                                                                                | -0.46 | -1.87 |
| GOBP GRANULOCYTE MIGRATION                                                                           | -0.35 | -1.87 |
| GOBP_REGULATION_OF_CANONICAL_WNT_SIGNALING_PATHWAY                                                   | -0.32 | -1.85 |
| GOBP_SKIN_DEVELOPMENT                                                                                | -0.28 | -1.85 |
| GOBP_ACTIN_FILAMENT_ORGANIZATION                                                                     | -0.25 | -1.85 |
| GOBP_CHEMOKINE_PRODUCTION                                                                            | -0.42 | -1.82 |
| GOBP_EMBRYO_DEVELOPMENT                                                                              | -0.18 | -1.69 |
| GOBP_REGULATION_OF_INTRACELLULAR_SIGNAL_TRANSDUCTION                                                 | -0.16 | -1.64 |
| GOBP_POSITIVE_REGULATION_OF_CELL_SUBSTRATE_ADHESION                                                  | -0.42 | -1.92 |
| GOBP_WOUND_HEALING                                                                                   | -0.24 | -1.89 |
| GOBP_POSITIVE_REGULATION_OF_RESPONSE_TO_EXTERNAL_STIMULUS                                            | -0.26 | -1.88 |
| GOBP_PLASMA_MEMBRANE_ORGANIZATION                                                                    | -0.42 | -2.01 |
| GOBP_POSITIVE_REGULATION_OF_LIPID_LOCALIZATION                                                       | -0.46 | -2.01 |
| GOBP_PHOSPHATIDYLCHOLINE_METABOLIC_PROCESS                                                           | -0.49 | -1.96 |
| GOBP_MEMORY                                                                                          | -0.45 | -1.96 |
| GOBP_REGULATION_OF_REGULATED_SECRETORY_PATHWAY                                                       | -0.44 | -1.94 |
| GOBP_POSITIVE_REGULATION_OF_VASCULATURE_DEVELOPMENT                                                  | -0.36 | -1.91 |
| GOBP_NEGATIVE_REGULATION_OF_IMMUNE_SYSTEM_PROCESS                                                    | -0.27 | -1.89 |
| GOBP_DETECTION_OF_STIMULUS_INVOLVED_IN_SENSORY_PERCEPTION                                            | -0.43 | -1.85 |
| GOBP_POSITIVE_REGULATION_OF_CYTOSKELETON_ORGANIZATION                                                | -0.36 | -1.84 |
| GOBP_REGULATION_OF_ACTIN_FILAMENT_BASED_PROCESS                                                      | -0.28 | -1.82 |

|                                                                       |       |       |
|-----------------------------------------------------------------------|-------|-------|
| GOBP_POSITIVE_REGULATION_OF_EPITHELIAL_CELL_DIFFERENTIATION           | -0.42 | -1.82 |
| GOBP_SYNAPTIC_SIGNALING                                               | -0.24 | -1.78 |
| GOBP_DEVELOPMENTAL_GROWTH_INVOLVED_IN_MORPHOGENESIS                   | -0.3  | -1.76 |
| GOBP_CELLULAR_RESPONSE_TO_HORMONE_STIMULUS                            | -0.22 | -1.69 |
| GOBP_RESPONSE_TO_ORGANIC_CYCLIC_COMPOUND                              | -0.19 | -1.68 |
| GOBP_CELLULAR_RESPONSE_TO_ALCOHOL                                     | -0.47 | -1.97 |
| GOBP_POSITIVE_REGULATION_OF_LEUKOCYTE_MEDIATED_IMMUNITY               | -0.37 | -1.87 |
| GOBP_REGULATION_OF_CELL_MORPHOGENESIS_INVOLVED_IN_DIFFERENTIATION     | -0.44 | -1.82 |
| GOBP_POSITIVE_REGULATION_OF_PROTEIN_KINASE_ACTIVITY                   | -0.23 | -1.67 |
| GOBP_REGULATION_OF_PROTEIN_KINASE_ACTIVITY                            | -0.21 | -1.65 |
| GOBP_POSITIVE_REGULATION_OF_NEURON_PROJECTION_DEVELOPMENT             | -0.47 | -1.93 |
| GOBP_NEGATIVE_REGULATION_OF_CANONICAL_WNT_SIGNALING_PATHWAY           | -0.41 | -1.82 |
| GOBP_ENDOTHELIUM_DEVELOPMENT                                          | -0.37 | -1.82 |
| GOBP_STEM_CELL_DIFFERENTIATION                                        | -0.3  | -1.79 |
| GOBP_DEVELOPMENTAL_MATURATION                                         | -0.3  | -1.79 |
| GOBP_REGIONALIZATION                                                  | -0.26 | -1.7  |
| GOBP_OSTEOLAST_DIFFERENTIATION                                        | -0.33 | -1.89 |
| GOBP_REGULATION_OF_DEFENSE_RESPONSE                                   | -0.22 | -1.76 |
| GOBP_CELLULAR_RESPONSE_TO_NITROGEN_COMPOUND                           | -0.2  | -1.7  |
| GOBP_SUPRAMOLECULAR_FIBER_ORGANIZATION                                | -0.2  | -1.69 |
| GOBP_MUSCLE_SYSTEM_PROCESS                                            | -0.24 | -1.68 |
| GOBP_POSITIVE_REGULATION_OF_CELL_DEATH                                | -0.2  | -1.67 |
| GOBP_RESPONSE_TO ABIOTIC_STIMULUS                                     | -0.17 | -1.62 |
| GOBP_SKIN_EPIDERMIS_DEVELOPMENT                                       | -0.44 | -1.93 |
| GOBP_REGULATION_OF_MUSCLE_CONTRACTION                                 | -0.37 | -1.89 |
| GOBP_POSITIVE_REGULATION_OF_DNA_BINDING_TRANSCRIPTION_FACTOR_ACTIVITY | -0.29 | -1.77 |
| GOBP_NEGATIVE_REGULATION_OF_LEUKOCYTE_CELL_CELL_ADHESION              | -0.35 | -1.77 |
| GOBP_DIGESTIVE_SYSTEM_PROCESS                                         | -0.37 | -1.74 |
| GOBP_NEGATIVE_REGULATION_OF_HEMOPOIESIS                               | -0.38 | -1.72 |
| GOBP_POSITIVE_REGULATION_OF_CYTOKINE_PRODUCTION                       | -0.23 | -1.67 |
| GOBP_IMMUNE_SYSTEM_DEVELOPMENT                                        | -0.17 | -1.6  |
| GOBP_POSITIVE_REGULATION_OF_LEUKOCYTE_PROLIFERATION                   | -0.35 | -1.83 |
| GOBP_EAR_DEVELOPMENT                                                  | -0.32 | -1.76 |
| GOBP_INTEGRIN_MEDIATED_SIGNALING_PATHWAY                              | -0.4  | -1.8  |
| GOBP_CARDIAC_MUSCLE_TISSUE_DEVELOPMENT                                | -0.31 | -1.78 |
| GOBP_REGULATION_OF_LYMPHOCYTE_MEDIATED_IMMUNITY                       | -0.35 | -1.77 |
| GOBP_REGULATION_OF_REPRODUCTIVE_PROCESS                               | -0.35 | -1.73 |
| GOBP_REGULATION_OF_CELLULAR_RESPONSE_TO_GROWTH_FACTOR_STIMULUS        | -0.27 | -1.66 |
| GOBP_POSITIVE_REGULATION_OF_SUPRAMOLECULAR_FIBER_ORGANIZATION         | -0.38 | -1.78 |
| GOBP_AMIDE_TRANSPORT                                                  | -0.28 | -1.74 |
| GOBP_MESENCHYME_DEVELOPMENT                                           | -0.27 | -1.68 |

|                                                                                                      |       |       |
|------------------------------------------------------------------------------------------------------|-------|-------|
| GOBP_REGULATION_OF_CELL_MATRIX_ADHESION                                                              | -0.4  | -1.79 |
| GOBP_CELL_KILLING                                                                                    | -0.4  | -1.72 |
| GOBP_CAMERA_TYPE_EYE_MORPHOGENESIS                                                                   | -0.43 | -1.89 |
| GOBP_LIPID_STORAGE                                                                                   | -0.43 | -1.75 |
| GOBP_CAMERA_TYPE_EYE_DEVELOPMENT                                                                     | -0.26 | -1.72 |
| GOBP_NEUTROPHIL_CHEMOTAXIS                                                                           | -0.35 | -1.71 |
| GOBP_REGULATION_OF_TRANS_SYNAPTIC_SIGNALING                                                          | -0.29 | -1.82 |
| GOBP_RENAL_SYSTEM_PROCESS                                                                            | -0.4  | -1.77 |
| GOBP_MYELOID_LEUKOCYTE_MIGRATION                                                                     | -0.28 | -1.76 |
| GOBP_NEGATIVE_REGULATION_OF_TRANSMEMBRANE_RECEPTOR_PROTEIN_SERINE_THREONINE_KINASE_SIGNALING_PATHWAY | -0.39 | -1.76 |
| GOBP_POSITIVE_REGULATION_OF_GTPASE_ACTIVITY                                                          | -0.29 | -1.75 |
| GOBP_CARDIAC_CHAMBER_MORPHOGENESIS                                                                   | -0.37 | -1.8  |
| GOBP_REGULATION_OF_SYNAPTIC_PLASTICITY                                                               | -0.41 | -1.74 |
| GOBP_MUSCLE_CELL_DIFFERENTIATION                                                                     | -0.24 | -1.72 |
| GOBP_RESPONSE_TO_INSULIN                                                                             | -0.3  | -1.7  |
| GOBP_AMINO_ACID_TRANSMEMBRANE_TRANSPORT                                                              | -0.41 | -1.7  |
| GOBP_LIPID_HOMEOSTASIS                                                                               | -0.27 | -1.69 |
| GOBP_FATTY_ACID_METABOLIC_PROCESS                                                                    | -0.22 | -1.59 |
| GOBP_MUCOPOLYSACCHARIDE_METABOLIC_PROCESS                                                            | -0.42 | -1.8  |
| GOBP_ENSHEATHMENT_OF_NEURONS                                                                         | -0.39 | -1.77 |
| GOBP_CELL_ADHESION_MEDIATED_BY_INTEGRIN                                                              | -0.41 | -1.71 |
| GOBP_FATTY_ACID_DERIVATIVE_METABOLIC_PROCESS                                                         | -0.38 | -1.69 |
| GOBP_XENOBIOTIC_METABOLIC_PROCESS                                                                    | -0.36 | -1.65 |
| GOBP_CELLULAR_ION_HOMEOSTASIS                                                                        | -0.2  | -1.6  |
| GOBP_NEGATIVE_REGULATION_OF_LYMPHOCYTE_ACTIVATION                                                    | -0.36 | -1.77 |
| GOBP_GASTRULATION                                                                                    | -0.3  | -1.72 |
| GOBP_REGULATION_OF_BMP_SIGNALING_PATHWAY                                                             | -0.37 | -1.7  |
| GOBP_MESENCHYMAL_CELL_DIFFERENTIATION                                                                | -0.29 | -1.77 |
| GOBP_REGULATION_OF_ADAPTIVE_IMMUNE_RESPONSE                                                          | -0.35 | -1.76 |
| GOBP_RESPONSE_TO_STEROID_HORMONE                                                                     | -0.25 | -1.73 |
| GOBP_DEMETHYLATION                                                                                   | -0.42 | -1.7  |
| GOBP_MUSCLE_CONTRACTION                                                                              | -0.27 | -1.7  |
| GOBP_TERPENOID_METABOLIC_PROCESS                                                                     | -0.38 | -1.68 |
| GOBP_NEURAL_PRECURSOR_CELL_PROLIFERATION                                                             | -0.32 | -1.65 |
| GOBP_METAL_ION_HOMEOSTASIS                                                                           | -0.2  | -1.63 |
| GOBP_MUSCLE_TISSUE_DEVELOPMENT                                                                       | -0.23 | -1.61 |
| GOBP_CARDIAC_CHAMBER_DEVELOPMENT                                                                     | -0.32 | -1.69 |
| GOBP_MAINTENANCE_OF_LOCATION                                                                         | -0.26 | -1.65 |
| GOBP_REGULATION_OF_CELLULAR_COMPONENT_SIZE                                                           | -0.24 | -1.63 |
| GOBP_POSITIVE_REGULATION_OF_CATALYTIC_ACTIVITY                                                       | -0.16 | -1.52 |
| GOBP_CELL_MATURATION                                                                                 | -0.34 | -1.75 |



|                                                                        |       |       |
|------------------------------------------------------------------------|-------|-------|
| GOBP_BIOLOGICAL_PROCESS_INVOLVED_IN_SYMBIOTIC_INTERACTION              | -0.27 | -1.73 |
| GOBP_REGULATION_OF_WNT_SIGNALING_PATHWAY                               | -0.27 | -1.69 |
| GOBP_REGULATION_OF_CELL_SIZE                                           | -0.31 | -1.68 |
| GOBP_REGULATION_OF_PHAGOCYTOSIS                                        | -0.35 | -1.74 |
| GOBP_REGULATION_OF_PEPTIDE_TRANSPORT                                   | -0.35 | -1.73 |
| GOBP_SKELETAL_SYSTEM_MORPHOGENESIS                                     | -0.3  | -1.68 |
| GOBP_TOLL_LIKE_RECEPTOR_SIGNALING_PATHWAY                              | -0.35 | -1.64 |
| GOBP_MUSCLE_STRUCTURE_DEVELOPMENT                                      | -0.18 | -1.5  |
| GOBP_LIPID_METABOLIC_PROCESS                                           | -0.14 | -1.49 |
| GOBP_MALE_SEX_DIFFERENTIATION                                          | -0.35 | -1.71 |
| GOBP_BIOLOGICAL_PROCESS_INVOLVED_IN_INTERACTION_WITH_HOST              | -0.32 | -1.71 |
| GOBP_GLOMERULUS_DEVELOPMENT                                            | -0.41 | -1.7  |
| GOBP_CELLULAR_RESPONSE_TO_OXYGEN_LEVELS                                | -0.32 | -1.69 |
| GOBP_REGULATION_OF_PRODUCTION_OF_MOLECULAR_MEDIATOR_OF_IMMUNE_RESPONSE | -0.35 | -1.67 |
| GOBP_CELLULAR_RESPONSE_TO_PEPTIDE                                      | -0.24 | -1.65 |
| GOBP_REGULATION_OF_INFLAMMATORY_RESPONSE                               | -0.23 | -1.64 |
| GOBP_REGULATION_OF_VESICLE_MEDIATED_TRANSPORT                          | -0.21 | -1.63 |
| GOBP_RESPONSE_TO_KETONE                                                | -0.31 | -1.7  |
| GOBP_BRANCHING_MORPHOGENESIS_OF_AN_EPITHELIAL_TUBE                     | -0.36 | -1.69 |
| GOBP_LYMPHOCYTE_MIGRATION                                              | -0.4  | -1.67 |
| GOBP_NEGATIVE_REGULATION_OF_SUPRAMOLECULAR_FIBER_ORGANIZATION          | -0.34 | -1.65 |
| GOBP_CARTILAGE_DEVELOPMENT                                             | -0.34 | -1.73 |
| GOBP_REGULATION_OF_NEURON_DIFFERENTIATION                              | -0.32 | -1.69 |
| GOBP_RESPONSE_TO_GROWTH_FACTOR                                         | -0.2  | -1.6  |
| GOBP_NEPHRON_DEVELOPMENT                                               | -0.36 | -1.73 |
| GOBP_NEGATIVE_REGULATION_OF_ION_TRANSPORT                              | -0.36 | -1.63 |
| GOBP_BONE_DEVELOPMENT                                                  | -0.31 | -1.59 |
| GOBP_NOTCH_SIGNALING_PATHWAY                                           | -0.32 | -1.72 |
| GOBP_REGULATED_EXOCYTOSIS                                              | -0.3  | -1.63 |
| GOBP_REGULATION_OF_CELL_PROJECTION_ASSEMBLY                            | -0.32 | -1.63 |
| GOBP_REGULATION_OF_EPITHELIAL_CELL_DIFFERENTIATION                     | -0.31 | -1.68 |
| GOBP_POSITIVE_REGULATION_OF_JNK_CASCADE                                | -0.38 | -1.65 |
| GOBP_PEPTIDE_TRANSPORT                                                 | -0.3  | -1.61 |
| GOBP_ANATOMICAL_STRUCTURE_MATURATION                                   | -0.28 | -1.6  |
| GOBP_POSITIVE_REGULATION_OF_INFLAMMATORY_RESPONSE                      | -0.32 | -1.6  |
| GOBP_POSITIVE_REGULATION_OF_DEFENSE_RESPONSE                           | -0.26 | -1.67 |
| GOBP GRANULOCYTE CHEMOTAXIS                                            | -0.31 | -1.62 |
| GOBP_POSITIVE_REGULATION_OF_TRANSFERASE_ACTIVITY                       | -0.19 | -1.52 |
| GOBP_ION_HOMEOSTASIS                                                   | -0.18 | -1.51 |
| GOBP_REGULATION_OF_BODY_FLUID_LEVELS                                   | -0.2  | -1.49 |
| GOBP_NEGATIVE_REGULATION_OF_WNT_SIGNALING_PATHWAY                      | -0.32 | -1.7  |

|                                                                                |       |       |
|--------------------------------------------------------------------------------|-------|-------|
| GOBP_REGULATION_OF_NIK_NF_KAPPAB_SIGNALING                                     | -0.41 | -1.68 |
| GOBP_PRIMARY_ALCOHOL_METABOLIC_PROCESS                                         | -0.35 | -1.64 |
| GOBP_PEPTIDYL_TYROSINE_DEPHOSPHORYLATION                                       | -0.37 | -1.63 |
| GOBP_ADENYLATE_CYCLASE_MODULATING_G_PROTEIN_COUPLED_RECEPTOR_SIGNALING_PATHWAY | -0.34 | -1.59 |
| GOBP_NEGATIVE_REGULATION_OF_NEURON_PROJECTION_DEVELOPMENT                      | -0.37 | -1.58 |
| GOBP_REGULATION_OF_MUSCLE_SYSTEM_PROCESS                                       | -0.3  | -1.61 |
| GOBP_REGULATION_OF_AXONOGENESIS                                                | -0.33 | -1.52 |
| GOBP_LEUKOCYTE_CHEMOTAXIS                                                      | -0.27 | -1.64 |
| GOBP_MYOBLAST_DIFFERENTIATION                                                  | -0.37 | -1.59 |
| GOBP_NEGATIVE_REGULATION_OF_TRANSCRIPTION_BY_RNA_POLYMERASE_II                 | -0.17 | -1.44 |
| GOBP_JNK_CASCADE                                                               | -0.31 | -1.63 |
| GOBP_TEMPERATURE_HOMEOSTASIS                                                   | -0.33 | -1.61 |
| GOBP_MONONUCLEAR_CELL_MIGRATION                                                | -0.3  | -1.6  |
| GOBP_ALPHA_BETA_T_CELL_DIFFERENTIATION                                         | -0.37 | -1.56 |
| GOBP_RESPONSE_TO_ACID_CHEMICAL                                                 | -0.32 | -1.55 |
| GOBP_POSITIVE_REGULATION_OF_STRESS_ACTIVATED_PROTEIN_KINASE_SIGNALING_CASCADE  | -0.32 | -1.54 |
| GOBP_EXOCYTOSIS                                                                | -0.22 | -1.52 |
| GOBP_LOCOMOTORY_BEHAVIOR                                                       | -0.34 | -1.57 |
| GOBP_RESPONSE_TO_TRANSFORMING_GROWTH_FACTOR_BETA                               | -0.25 | -1.52 |
| GOBP_POSITIVE_REGULATION_OF_LYMPHOCYTE_MEDIATED_IMMUNITY                       | -0.35 | -1.63 |
| GOBP_PHOSPHOLIPID_TRANSPORT                                                    | -0.35 | -1.58 |
| GOBP_CALCIIUM_ION_TRANSMEMBRANE_TRANSPORT                                      | -0.28 | -1.55 |
| GOBP_REGULATION_OF_PROTEIN_SECRETION                                           | -0.26 | -1.52 |
| GOBP_TUBE_FORMATION                                                            | -0.33 | -1.59 |
| GOBP_PLACENTA_DEVELOPMENT                                                      | -0.28 | -1.53 |
| GOBP_LEARNING                                                                  | -0.37 | -1.58 |
| GOBP_RESPONSE_TO_TUMOR_NECROSIS_FACTOR                                         | -0.28 | -1.61 |
| <b>GOBP_REGULATION_OF_LIPID_METABOLIC_PROCESS</b>                              | -0.22 | -1.5  |
| GOBP_REGULATION_OF_LEUKOCYTE_MIGRATION                                         | -0.26 | -1.59 |
| GOBP_RECEPTOR_SIGNALING_PATHWAY_VIA_STAT                                       | -0.35 | -1.54 |
| GOBP_RESPONSE_TO_CYTOKINE                                                      | -0.16 | -1.44 |
| GOBP_AMINOGLYCAN_METABOLIC_PROCESS                                             | -0.31 | -1.57 |
| GOBP_CELLULAR_RESPONSE_TO_INSULIN_STIMULUS                                     | -0.28 | -1.51 |
| GOBP_PROTEIN_LOCALIZATION_TO_EXTRACELLULAR_REGION                              | -0.24 | -1.52 |
| GOBP_NEUROTRANSMITTER_TRANSPORT                                                | -0.29 | -1.5  |
| GOBP_POSITIVE_REGULATION_OF_MOLECULAR_FUNCTION                                 | -0.14 | -1.38 |
| GOBP_ZYMOGEN_ACTIVATION                                                        | -0.36 | -1.57 |
| GOBP_NEURON_MIGRATION                                                          | -0.32 | -1.53 |
| GOBP_FOREBRAIN_DEVELOPMENT                                                     | -0.22 | -1.49 |
| GOBP_REGULATION_OF_PROTEIN_SERINE_THREONINE_KINASE_ACTIVITY                    | -0.22 | -1.5  |
| GOBP_RESPONSE_TO_PURINE_CONTAINING_COMPOUND                                    | -0.32 | -1.52 |

|                                                                         |       |       |
|-------------------------------------------------------------------------|-------|-------|
| GOBP_RECEPTOR_MEDIATED_ENDOCYTOSIS                                      | -0.28 | -1.51 |
| GOBP_TISSUE_REGENERATION                                                | -0.38 | -1.58 |
| GOBP_CYTOKINE_MEDIATED_SIGNALING_PATHWAY                                | -0.22 | -1.5  |
| GOBP_REPRODUCTIVE_SYSTEM_DEVELOPMENT                                    | -0.2  | -1.45 |
| GOBP_LIPID_CATABOLIC_PROCESS                                            | -0.23 | -1.45 |
| GOBP_CELLULAR_RESPONSE_TO_ORGANIC_CYCLIC_COMPOUND                       | -0.19 | -1.44 |
| GOBP_REGULATION_OF_ACTIN_FILAMENT_ORGANIZATION                          | -0.27 | -1.54 |
| GOBP_MYELOID_CELL_DIFFERENTIATION                                       | -0.2  | -1.45 |
| GOBP_DIGESTIVE_SYSTEM_DEVELOPMENT                                       | -0.3  | -1.53 |
| GOBP_CARBOHYDRATE_HOMEOSTASIS                                           | -0.28 | -1.52 |
| GOBP_GLAND_DEVELOPMENT                                                  | -0.21 | -1.47 |
| GOBP_DETECTION_OF_ABIOTIC_STIMULUS                                      | -0.3  | -1.47 |
| GOBP_NEGATIVE_REGULATION_OF_BINDING                                     | -0.35 | -1.53 |
| GOBP_THIOESTER_METABOLIC_PROCESS                                        | -0.32 | -1.49 |
| GOBP_REGULATION_OF_PEPTIDASE_ACTIVITY                                   | -0.2  | -1.44 |
| GOBP_MONOVALENT_INORGANIC_CATION_HOMEOSTASIS                            | -0.3  | -1.55 |
| GOBP_RESPONSE_TO_INORGANIC_SUBSTANCE                                    | -0.18 | -1.43 |
| GOBP_REGULATION_OF_RESPONSE_TO_STRESS                                   | -0.14 | -1.37 |
| GOBP_PROGRAMMED_CELL_DEATH                                              | -0.13 | -1.33 |
| GOBP_REGULATION_OF_MUSCLE_CELL_DIFFERENTIATION                          | -0.32 | -1.55 |
| GOBP_ANTIGEN_RECEPTOR_MEDIATED_SIGNALING_PATHWAY                        | -0.27 | -1.45 |
| GOBP_PRODUCTION_OF_MOLECULAR_MEDIATOR_INVOLVED_IN_INFLAMMATORY_RESPONSE | -0.36 | -1.48 |
| GOBP_RESPONSE_TO_METAL_ION                                              | -0.21 | -1.47 |
| GOBP_RESPONSE_TO_PEPTIDE_HORMONE                                        | -0.21 | -1.48 |
| GOBP_REGULATION_OF_CELL_DEATH                                           | -0.13 | -1.34 |
| GOBP_REGULATION_OF_SMALL_GTPASE_MEDIATED_SIGNAL_TRANSDUCTION            | -0.24 | -1.49 |
| GOBP_NEUROMUSCULAR_PROCESS                                              | -0.34 | -1.47 |
| GOBP_NEURAL_TUBE_DEVELOPMENT                                            | -0.29 | -1.53 |
| GOBP_MAINTENANCE_OF_PROTEIN_LOCATION                                    | -0.35 | -1.48 |
| GOBP_CONNECTIVE_TISSUE_DEVELOPMENT                                      | -0.24 | -1.45 |
| GOBP_CELL_PROJECTION_ASSEMBLY                                           | -0.2  | -1.41 |
| GOBP_REGULATION_OF_STRESS_ACTIVATED_PROTEIN_KINASE_SIGNALING_CASCADE    | -0.27 | -1.53 |
| GOBP_NEUTRAL_LIPID_METABOLIC_PROCESS                                    | -0.31 | -1.46 |
| GOBP_MORPHOGENESIS_OF_EMBRYONIC_EPITHELIUM                              | -0.31 | -1.46 |
| GOBP_NIK_NF_KAPPAB_SIGNALING                                            | -0.34 | -1.49 |
| GOBP_REGULATION_OF_B_CELL_ACTIVATION                                    | -0.36 | -1.48 |
| GOBP KERATINOCYTE DIFFERENTIATION                                       | -0.29 | -1.46 |
| GOBP_EPIDERMAL_CELL_DIFFERENTIATION                                     | -0.25 | -1.45 |
| GOBP_POSITIVE_REGULATION_OF_GENE_EXPRESSION                             | -0.14 | -1.34 |
| GOBP_CILIUM_MOVEMENT                                                    | -0.35 | -1.44 |
| GOBP_TRANSFORMING_GROWTH_FACTOR_BETA_RECEPTOR_SIGNALING_PATHWAY         | -0.26 | -1.41 |

|                                                                      |       |       |
|----------------------------------------------------------------------|-------|-------|
| GOBP_REGULATION_OF_SUPRAMOLECULAR_FIBER_ORGANIZATION                 | -0.21 | -1.4  |
| GOBP_POSITIVE_REGULATION_OF_RESPONSE_TO_BIOTIC_STIMULUS              | -0.26 | -1.42 |
| GOBP_REGULATION_OF_FATTY_ACID_METABOLIC_PROCESS                      | -0.36 | -1.46 |
| GOBP_PROTEIN_AUTOPHOSPHORYLATION                                     | -0.26 | -1.46 |
| GOBP_REGULATION_OF_CELL_SHAPE                                        | -0.31 | -1.46 |
| GOBP_POSITIVE_REGULATION_OF_WNT_SIGNALING_PATHWAY                    | -0.31 | -1.44 |
| GOBP_LEUKOCYTE_DEGRANULATION                                         | -0.32 | -1.43 |
| GOBP_POSITIVE_REGULATION_OF_PROTEIN_SERINE_THREONINE_KINASE_ACTIVITY | -0.24 | -1.4  |
| GOBP_NEGATIVE_REGULATION_OF_PHOSPHORUS_METABOLIC_PROCESS             | -0.19 | -1.38 |
| GOBP_CARDIAC_VENTRICLE_MORPHOGENESIS                                 | -0.35 | -1.44 |
| GOBP_CYTOSKELETON_ORGANIZATION                                       | -0.13 | -1.31 |
| GOBP_REGULATION_OF_TRANSFERASE_ACTIVITY                              | -0.15 | -1.33 |
| GOBP_CELL_RECOGNITION                                                | -0.29 | -1.42 |
| GOBP_HEMOSTASIS                                                      | -0.21 | -1.4  |
| GOBP_SMOOTH_MUSCLE_CONTRACTION                                       | -0.31 | -1.44 |
| GOBP_ICOSANOID_METABOLIC_PROCESS                                     | -0.31 | -1.43 |
| GOBP_POSITIVE_REGULATION_OF_CELL_PROJECTION_ORGANIZATION             | -0.25 | -1.37 |
| GOBP_POSITIVE_REGULATION_OF_PROTEIN_SECRETION                        | -0.28 | -1.39 |
| GOBP_CELLULAR_LIPID_METABOLIC_PROCESS                                | -0.14 | -1.31 |
| GOBP_REGULATION_OF_LEUKOCYTE_CHEMOTAXIS                              | -0.29 | -1.42 |
| GOBP_DIVALENT_INORGANIC_CATION_HOMEOSTASIS                           | -0.19 | -1.34 |
| GOBP_REGULATION_OF_NEUROTRANSMITTER_LEVELS                           | -0.27 | -1.42 |
| GOBP_PRODUCTION_OF_MOLECULAR_MEDIATOR_OF_IMMUNE_RESPONSE             | -0.24 | -1.36 |
| GOBP_POSITIVE_REGULATION_OF_NF_KAPPA_B_TRANSCRIPTION_FACTOR_ACTIVITY | -0.28 | -1.36 |
| GOBP_REGULATION_OF_RESPONSE_TO_OXIDATIVE_STRESS                      | -0.31 | -1.4  |
| GOBP_VESICLE_MEDIATED_TRANSPORT_IN_SYNAPSE                           | -0.28 | -1.36 |
| GOBP_AXON_EXTENSION                                                  | -0.31 | -1.42 |
| GOBP_MULTI_ORGANISM_REPRODUCTIVE_PROCESS                             | -0.14 | -1.31 |
| GOBP_MECHANORECEPTOR_DIFFERENTIATION                                 | -0.34 | -1.36 |
| GOBP_SENSORY_PERCEPTION_OF_MECHANICAL_STIMULUS                       | -0.26 | -1.37 |
| GOBP_REGULATION_OF_DNA_BINDING_TRANSCRIPTION_FACTOR_ACTIVITY         | -0.2  | -1.37 |
| GOBP_REGULATION_OF_RESPONSE_TO_BIOTIC_STIMULUS                       | -0.2  | -1.35 |
| GOBP_REGULATION_OF_EPITHELIAL_CELL_APOPTOTIC_PROCESS                 | -0.32 | -1.41 |
| GOBP_CELLULAR_RESPONSE_TO_PEPTIDE_HORMONE_STIMULUS                   | -0.24 | -1.4  |
| GOBP_CELL_ACTIVATION_INVOLVED_IN_IMMUNE_RESPONSE                     | -0.22 | -1.38 |
| GOBP_POSITIVE_REGULATION_OF_CALCIUM_ION_TRANSPORT                    | -0.32 | -1.36 |
| GOBP_NEGATIVE_REGULATION_OF_CELL_PROJECTION_ORGANIZATION             | -0.28 | -1.36 |
| GOBP_DEVELOPMENT_OF_PRIMARY_SEXUAL_CHARACTERISTICS                   | -0.24 | -1.36 |
| GOBP_ACUTE_INFLAMMATORY_RESPONSE                                     | -0.29 | -1.39 |
| GOBP_PATTERN_RECOGNITION_RECEPTOR_SIGNALING_PATHWAY                  | -0.25 | -1.34 |
| GOBP_MAINTENANCE_OF_LOCATION_IN_CELL                                 | -0.24 | -1.32 |

|                                                                                   |       |       |
|-----------------------------------------------------------------------------------|-------|-------|
| GOBP_MESODERM_DEVELOPMENT                                                         | -0.28 | -1.34 |
| GOBP_SEX_DIFFERENTIATION                                                          | -0.22 | -1.34 |
| GOBP_RETINA_DEVELOPMENT_IN_CAMERA_TYPE_EYE                                        | -0.27 | -1.35 |
| GOBP_REGULATION_OF_AUTOPHAGY                                                      | -0.21 | -1.34 |
| GOBP_MYELOID_CELL_ACTIVATION_INVOLVED_IN_IMMUNE_RESPONSE                          | -0.29 | -1.33 |
| GOBP_REGULATION_OF_PHOSPHOPROTEIN_PHOSPHATASE_ACTIVITY                            | -0.32 | -1.36 |
| GOBP_RESPONSE_TO_TEMPERATURE_STIMULUS                                             | -0.28 | -1.35 |
| GOBP_MUSCLE_CELL_DEVELOPMENT                                                      | -0.28 | -1.39 |
| GOBP_TELENCEPHALON_DEVELOPMENT                                                    | -0.25 | -1.37 |
| GOBP_RESPONSE_TO_OXIDATIVE_STRESS                                                 | -0.18 | -1.3  |
| GOBP_POSITIVE_REGULATION_OF_TUMOR_NECROSIS_FACTOR_SUPERFAMILY_CYTOKINE_PRODUCTION | -0.33 | -1.4  |
| GOBP_REGULATION_OF_REACTIVE_OXYGEN_SPECIES_METABOLIC_PROCESS                      | -0.25 | -1.36 |
| GOBP_AGING                                                                        | -0.23 | -1.33 |
| GOBP_EMBRYONIC_SKELETAL_SYSTEM_DEVELOPMENT                                        | -0.29 | -1.35 |
| GOBP_CELLULAR_COMPONENT_ASSEMBLY_INVOLVED_IN_MORPHOGENESIS                        | -0.34 | -1.41 |
| GOBP_POSITIVE_REGULATION_OF_PRODUCTION_OF_MOLECULAR_MEDIATOR_OF_IMMUNE_RESPONSE   | -0.31 | -1.33 |
| GOBP_SKELETAL_MUSCLE_ORGAN_DEVELOPMENT                                            | -0.29 | -1.34 |
| GOBP_DEVELOPMENTAL_PROCESS_INVOLVED_IN_REPRODUCTION                               | -0.14 | -1.25 |
| GOBP_REGULATION_OF_CYTOSKELETON_ORGANIZATION                                      | -0.17 | -1.31 |
| GOBP_ADAPTIVE_THERMOGENESIS                                                       | -0.27 | -1.31 |
| GOBP_RESPONSE_TO_NITROGEN_COMPOUND                                                | -0.13 | -1.26 |
| GOBP_STRESS_ACTIVATED_PROTEIN_KINASE_SIGNALING_CASCADE                            | -0.22 | -1.34 |
| GOBP_PEPTIDYL_AMINO_ACID_MODIFICATION                                             | -0.13 | -1.26 |
| GOBP_SMAD_PROTEIN_SIGNAL_TRANSDUCTION                                             | -0.32 | -1.32 |
| GOBP_REGULATION_OF_RAS_PROTEIN_SIGNAL_TRANSDUCTION                                | -0.26 | -1.32 |
| GOBP_POSITIVE_REGULATION_OF_PROTEIN_LOCALIZATION_TO_CELL_PERIPHERY                | -0.32 | -1.32 |
| GOBP_NUCLEOSIDE_BISPHOSPHATE_METABOLIC_PROCESS                                    | -0.25 | -1.32 |
| GOBP_REGULATION_OF_CELLULAR_KETONE_METABOLIC_PROCESS                              | -0.27 | -1.31 |
| GOBP_EPITHELIAL_TUBE_FORMATION                                                    | -0.28 | -1.32 |
| GOBP_ISOPRENOID_METABOLIC_PROCESS                                                 | -0.25 | -1.31 |
| GOBP_ENDOCRINE_SYSTEM_DEVELOPMENT                                                 | -0.28 | -1.3  |
| GOBP_POSITIVE_REGULATION_OF_LEUKOCYTE_MIGRATION                                   | -0.26 | -1.31 |
| GOBP_NEGATIVE_REGULATION_OF_DEVELOPMENTAL_GROWTH                                  | -0.28 | -1.3  |
| GOBP_NEURAL_TUBE_FORMATION                                                        | -0.29 | -1.27 |
| GOBP_FATTY_ACID_BIOSYNTHETIC_PROCESS                                              | -0.25 | -1.31 |
| GOBP_VIRAL_LIFE_CYCLE                                                             | -0.18 | -1.27 |
| GOBP_REGULATION_OF_ACTIN_FILAMENT_LENGTH                                          | -0.26 | -1.3  |
| GOBP_NEGATIVE_REGULATION_OF_VIRAL_PROCESS                                         | -0.32 | -1.3  |
| GOBP_POSITIVE_REGULATION_OF_INNATE_IMMUNE_RESPONSE                                | -0.26 | -1.28 |
| GOBP_REGULATION_OF_MYELOID_CELL_DIFFERENTIATION                                   | -0.22 | -1.28 |
| GOBP_VENTRICULAR_SEPTUM_DEVELOPMENT                                               | -0.32 | -1.3  |

|                                                      |       |       |
|------------------------------------------------------|-------|-------|
| GOBP_REGULATION_OF_CARBOHYDRATE_METABOLIC_PROCESS    | -0.24 | -1.28 |
| GOBP_REGULATION_OF_CALCIUM_ION_TRANSPORT             | -0.24 | -1.29 |
| GOBP_NEGATIVE_REGULATION_OF_NEURON_APOPTOTIC_PROCESS | -0.27 | -1.28 |
| GOBP_REGULATION_OF_PROTEIN_BINDING                   | -0.24 | -1.28 |
| GOBP_OLEFINIC_COMPOUND_METABOLIC_PROCESS             | -0.28 | -1.26 |
